# Supplementary figures and images for: A Novel Paclitaxel Derivative for Triple-Negative Breast Cancer Chemotherapy
Source: MDPI journal article supplement (doi:10.3390/molecules28093662), 2023-04-23

# Supplementary Materials

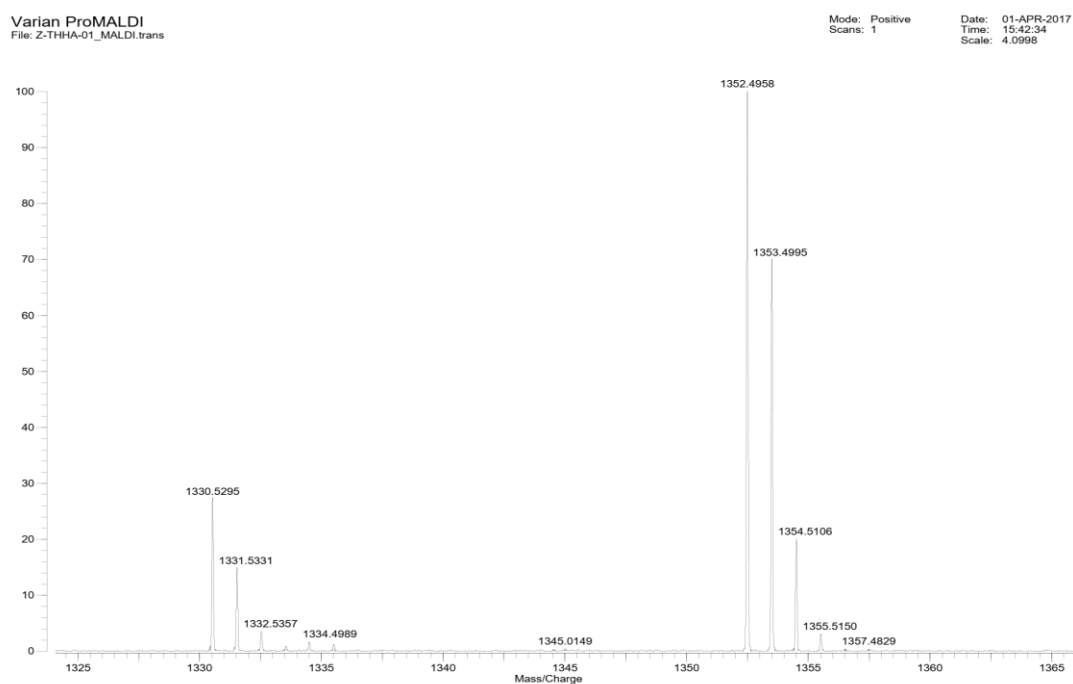

Figure S1. The high resolution mass spectrometry (HRMS) of PTX-TTHA.

Supplement: s1 [file s1]
